# Supplementary material
Source: HighWire-hosted journal article supplement (https://cmaj.ca/highwire/filestream/79843/field_highwire_adjunct_files/4/210131-res-5-at.pdf)

**Appendix 5: Broker role as identified by the sensor net.**

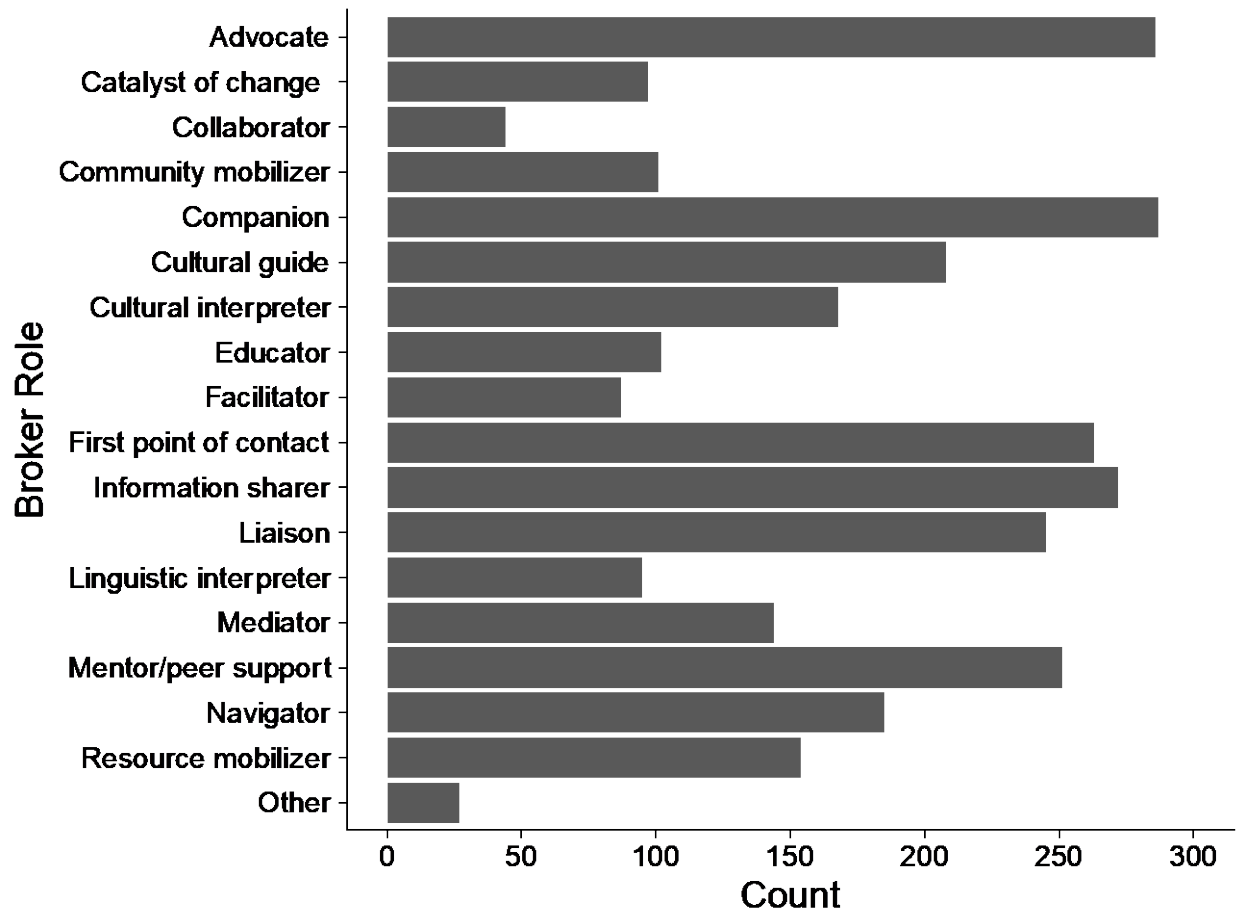

Supplement: 210131-res-5-at.pdf [file 210131-res-5-at.pdf]
